# Supplementary material for: Evaluation of a guideline directed medical therapy titration program in patients with heart failure with reduced ejection fraction
Source: PubMed Central journal article supplement — Int J Cardiol Heart Vasc. 2018 Nov 8;22:1–5. doi: 10.1016/j.ijcha.2018.10.003 (PMC6240631; doi:10.1016/j.ijcha.2018.10.003), 2018-11-08
Supplement: mmc1.pdf [file mmc1.pdf]

|                                   | Common Medications     | Initiation Dose | Goal Dose    |
|-----------------------------------|------------------------|-----------------|--------------|
| <b>ARNI/ACE/ARB</b>               | Sacubtril/Valsartan    | 24/26mg BID     | 97/103mg BID |
|                                   | Lisinopril             | 2.5mg daily     | 40mg daily   |
|                                   | Valsartan              | 40mg daily      | 320mg daily  |
|                                   | Losartan               | 25mg daily      | 150mg daily  |
| <b>Beta Blocker</b>               | Carvedilol             | 3.125mg BID     | 25mg BID     |
|                                   | Metoprolol Succinate   | 12.5mg daily    | 200mg daily  |
| <b>Aldosterone Antagonist</b>     | Spirinolactone         | Per protocol *  | 25mg daily   |
|                                   | Eplerenone             | 25mg daily      | 50mg daily   |
| <b>Hydralazine &amp; Nitrates</b> | Hydralazine            | 25mg TID        | 100mg TID    |
|                                   | Isosorbide mononitrate | 10mg daily      | 120mg daily  |
|                                   | Isosorbide dinitrate   | 20mg TID        | 40mg TID     |

**Figure S1:** Guideline directed medical therapy with recommended initiation and target doses as outlined by ACC/AHA/HFSA<sup>1,2</sup>

**Ambulatory Aldosterone Antagonist Protocol**

**DO NOT ACTIVATE PROTOCOL IF:**

eGFR < 30 ml/min/1.73m<sup>2</sup>  
 Baseline potassium > 5 mmol/L

**ALDOSTERONE ANTAGONIST INITIATION RECOMMENDATIONS:**

Begin AA therapy at dose of 25mg daily in patients maintained on ACE/ARB/ARNI with NYHA III-IV symptoms and EF < 40%  
 If serum potassium level increases to >5.5 mmol/L reduce AA dosage to 25mg every other day and reevaluate response after 1 week  
 Serum potassium level should be checked during any heart failure exacerbation

Begin AA therapy at dose of 12.5mg daily if:

Baseline serum potassium level >4.2 mmol/L  
 eGFR is 30 to 49 mL/min/1.73m<sup>2</sup>  
 If serum potassium level increases to >5.5 mmol/L reduce AA dosage to 12.5mg every other day and reevaluate response after 1 week

**Recommend stoppage of Aldactone if:**

Creatinine increases >25%  
 K > 6 mmol/L

**Figure S2:** Aldosterone Antagonist titration protocol

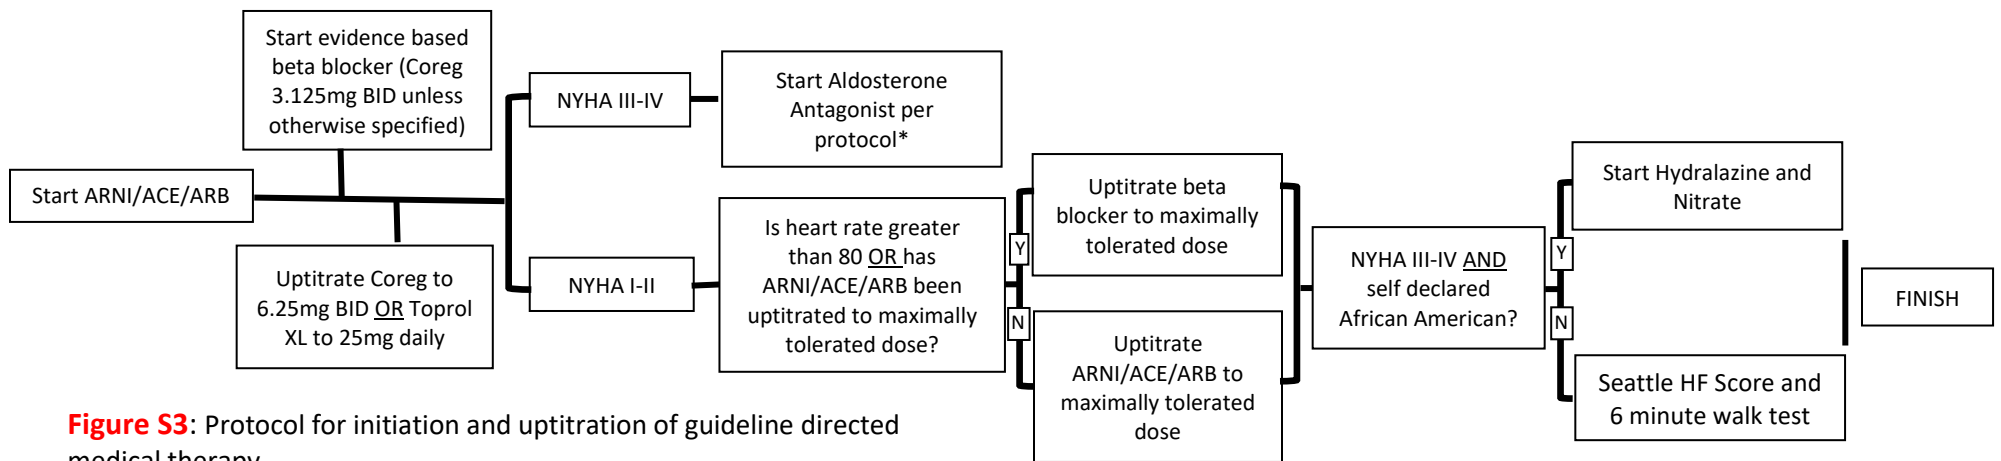

**Figure S3:** Protocol for initiation and uptitration of guideline directed medical therapy

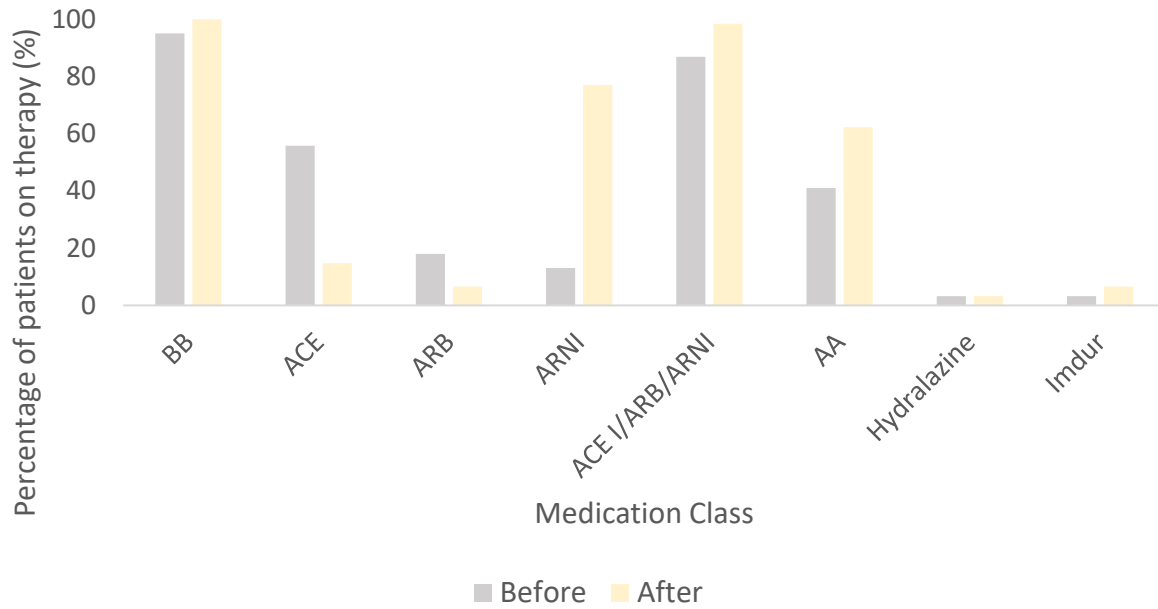

**Figure S4:** Proportion of patients tolerating medical therapy by class at any dosage before and after nursing directed uptitration

| <b>Table S1: Reasons for intolerance of uptitration with</b>   |   |
|----------------------------------------------------------------|---|
| <b>Failure to uptitrate with beta-blockers (n=17)</b>          |   |
| Bradycardia                                                    | 8 |
| Hypotension                                                    | 5 |
| Loss to follow up                                              | 2 |
| LVEF recovered                                                 | 1 |
| Progressed to advanced therapies                               | 1 |
| <b>Failure to uptitrate with ARNI (n= 22)</b>                  |   |
| Hypotension                                                    | 8 |
| Excessive copay                                                | 4 |
| Prior authorization rejected                                   | 2 |
| Loss to follow up                                              | 2 |
| LVEF recovered                                                 | 1 |
| Declined frequent blood draws                                  | 1 |
| Fatigue                                                        | 1 |
| Cough                                                          | 1 |
| Diarrhea                                                       | 1 |
| Death                                                          | 1 |
| <b>Failure to uptitrate with aldosterone inhibitors (n=22)</b> |   |
| Hyperkalemia                                                   | 7 |
| Hypotension                                                    | 5 |
| Gynecomastia                                                   | 5 |
| Declined frequent blood draws                                  | 2 |
| LVEF recovered                                                 | 1 |
| Renal failure                                                  | 1 |
| Fatigue                                                        | 1 |
| Dizziness                                                      | 1 |
| Progressed to advanced therapies                               | 1 |
| Tinnitus                                                       | 1 |
| Rash                                                           | 1 |
